# Supplementary material
Source: PubMed Central journal article supplement (PMC3787486)
Supplement: Supp_Fig1.pdf [file Supp_Fig1.pdf]

## Supplementary Data

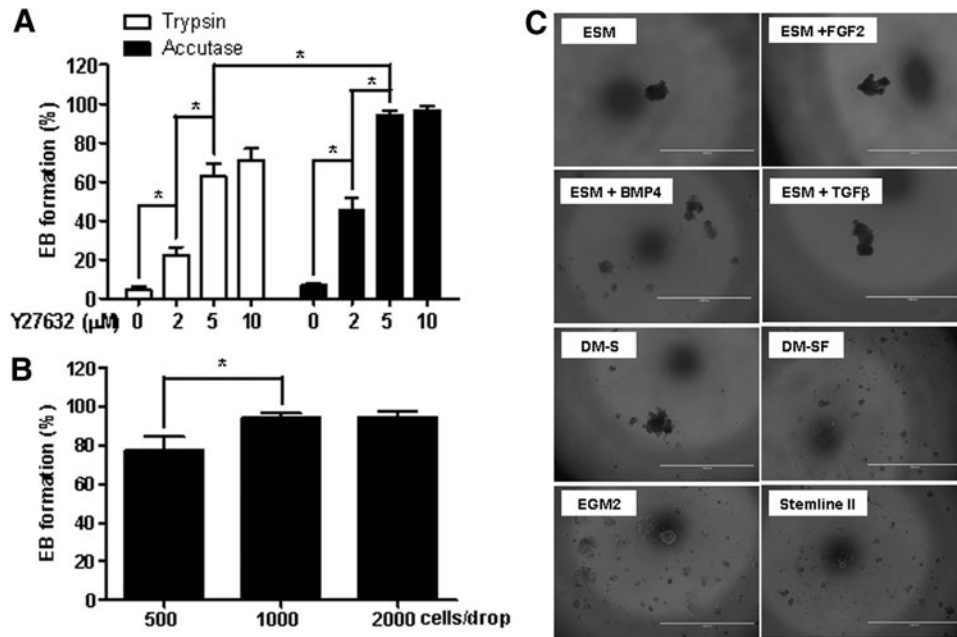

**SUPPLEMENTARY FIG. S1.** Conditions of EB generation in hanging drops. **(A)** Effect of Trypsin and Accutase on EB formation in the presence of different concentrations of ROCK inhibitor Y27632. **(B)** Comparison of EB formation by different hPSC number in one drop of 25 μL ESM medium without FGF2. **(C)** Effect of different media on EB formation. One thousand hPSCs were used in one drop of 25 μL media. Data are represented as mean ± SD from three independent experiments. \* $P < 0.05$ . DM-S, serum-containing differentiation medium; DM-SF, serum-free differentiation medium; EB, embryoid body; ESM, ESC culture medium; hPSC, human pluripotent stem cell; ROCK, Rho-dependent protein kinase; TGF-β, transforming growth factor beta.
