# Supplementary material
Source: PubMed Central journal article supplement (PMC3787486)
Supplement: Supp_Fig2.pdf [file Supp_Fig2.pdf]

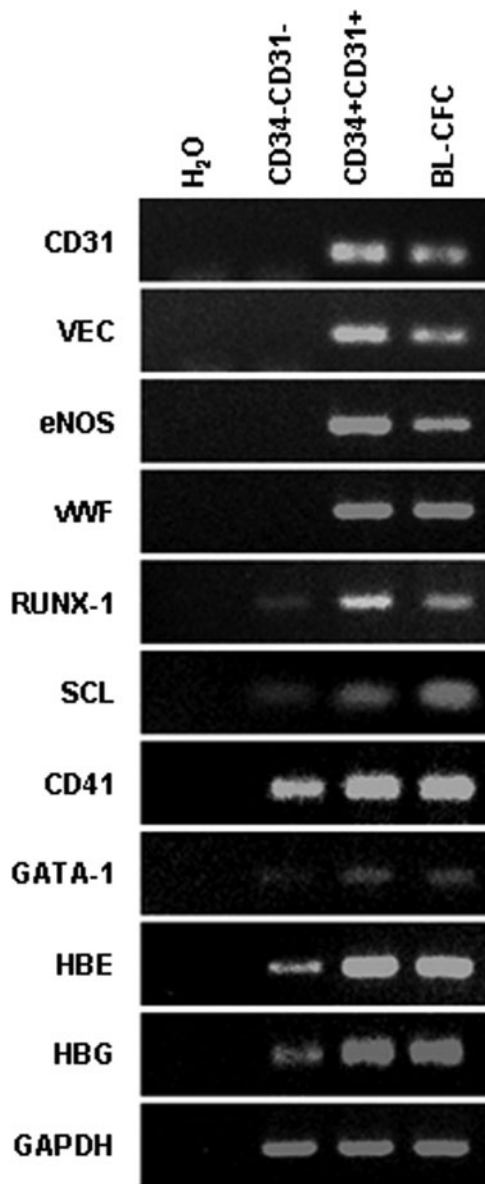

**SUPPLEMENTARY FIG. S2.** RT-PCR for gene expression of blast colonies. The CD34<sup>+</sup>CD31<sup>+</sup>VEC<sup>+</sup> cells from day 10 EBs (2,000 cells per well) were cultured in the methylcellulose medium with both hematopoietic and endothelial growth factors. At day 4, 10 blast colonies (BL-CFC) were pooled together for RNA extraction. Gene expressions of hematopoietic and endothelial markers were determined by RT-PCR. CD34<sup>-</sup>CD31<sup>-</sup> cells and CD34<sup>+</sup>CD31<sup>+</sup> cells from day 10 EBs were used as controls. BL-CFC, blast colony-forming cell. RT-PCR, reverse transcription polymerase chain reaction.
