# Supplementary material
Source: PubMed Central journal article supplement (PMC3787486)
Supplement: Supp_Fig3.pdf [file Supp_Fig3.pdf]

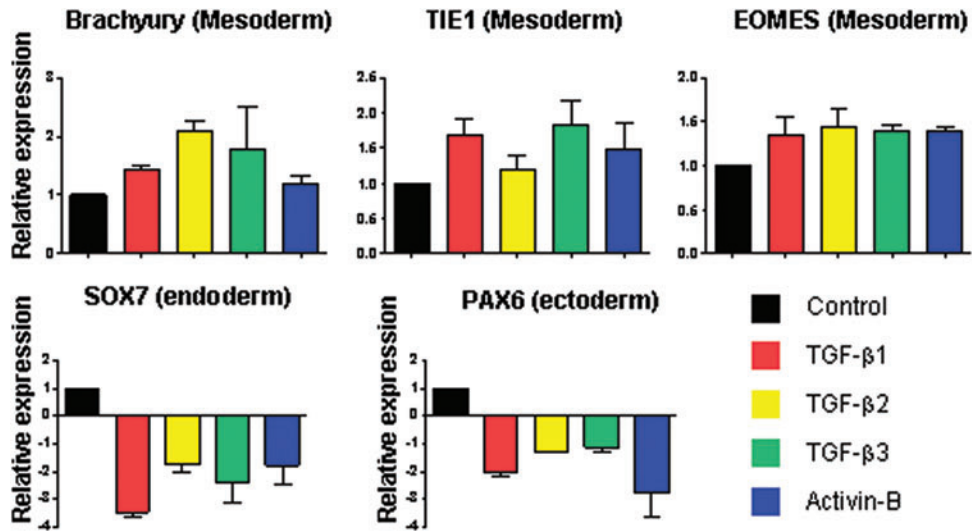

**SUPPLEMENTARY FIG. S3.** Effects of TGF-β super family members on early stage differentiation of hPSCs. Two ng/mL different TGF-β super family members were added, respectively, from day 0 to 4. Gene expression levels were checked by qPCR for mesodermal (*Brachyury*, *TIE1*, *EOMES*), endodermal (*SOX7*), and ectodermal (*PAX6*) markers at day 4. Data are represented as mean ± SD from three independent experiments. qPCR, quantitative polymerase chain reaction.
