# Supplementary material
Source: PubMed Central journal article supplement (PMC3787486)
Supplement: Supp_Fig4.pdf [file Supp_Fig4.pdf]

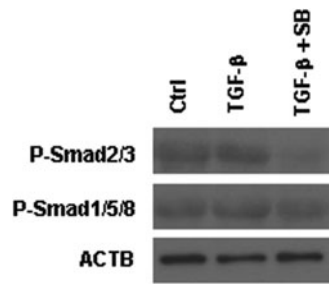

**SUPPLEMENTARY FIG. S4.** Western blot analysis of Smad phosphorylation. The undifferentiated hESCs (H1) were incubated with 10 ng/mL TGF- $\beta$ 1 and/or 10  $\mu$ M SB431542 for 30 min. Cells were lysed for western blot assay of phosphorylated Smad1/5/8 and Smad2/3.  $\beta$ -Actin was used as a loading control. hESC, human embryonic stem cell.
