# Supplementary material
Source: PubMed Central journal article supplement (PMC3787486)
Supplement: Supp_Fig5.pdf [file Supp_Fig5.pdf]

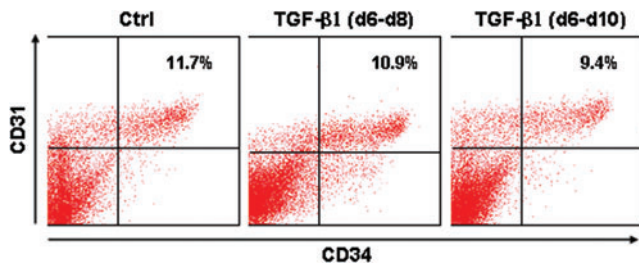

**SUPPLEMENTARY FIG. S5.** Minor effects of TGF-β1 addition on hemangioblast generation. TGF-β1 (2 ng/mL) was added from day 6 to 10. The medium was changed every 2 days. The CD34<sup>+</sup>CD31<sup>+</sup> progenitors were analyzed by flow cytometry at day 10. Data were representative of three independent experiments.
