# Supplementary material
Source: PubMed Central journal article supplement (PMC3787486)
Supplement: Supp_Table1.pdf [file Supp_Table1.pdf]

SUPPLEMENTARY TABLE S1. SUMMARY  
OF CELL CULTURE MEDIA

|                | <i>ESM</i> | <i>SFEGM</i> | <i>DM-S</i> | <i>DM-SF</i> |
|----------------|------------|--------------|-------------|--------------|
| Basic medium   | DMEM/F12   | EBM-2        | IMDM        | IMDM         |
| FBS            |            |              | 15%         |              |
| KSR            | 20%        | 15%          |             | 15%          |
| BIT-9500       |            |              |             |              |
| L-Glutamine    | 2 mM       |              | 2 mM        | 2 mM         |
| NEAA           | 0.1 mM     |              | 0.1 mM      | 0.1 mM       |
| P/S            | 1×         | 1×           | 1×          | 1×           |
| 2-ME           | 0.1 mM     |              |             | 0.1 mM       |
| 1-Thioglycerol |            |              | 0.45 mM     |              |
| FGF-2          |            | 5 ng/mL      |             |              |
| VEGF           |            | 10 ng/mL     |             |              |
| EGF            |            | 5 ng/mL      |             |              |
| IGF-1          |            | 10 ng/mL     |             |              |
| Heparin        |            | 1 U/mL       |             |              |
| Hydrocortisone |            | 1 µg/mL      |             |              |
| Ascorbic Acid  |            | 20 µg/mL     |             |              |

DM-S, serum-containing differentiation medium; DM-SF, serum-free differentiation medium; EBM-2, endothelial basal medium 2; EGF, epidermal growth factor; ESM, ESC culture medium; FBS, fetal bovine serum; IGF-1, Insulin-like growth factor 1; IMDM, Iscove's modified Dulbecco's medium; FGF-2, fibroblast growth factor 2; KSR, knockout serum replacement; NEAA, non-essential amino acids; SFEGM, serum-free endothelial cell growth medium; VEGF, vascular endothelial growth factor.
