# Supplementary material
Source: PubMed Central journal article supplement (PMC3787486)
Supplement: Supp_Table2.pdf [file Supp_Table2.pdf]

SUPPLEMENTARY TABLE S2. PRIMERS FOR REAL-TIME QPCR AND RT-PCR

| <i>Name</i> | <i>Forward primer</i>    | <i>Reverse primer</i>    |
|-------------|--------------------------|--------------------------|
| Brachyury   | GGATGAAGGCTCCCCTCTC      | GCTGTGATCTCCTCGTTCTGATA  |
| TIE1        | TCACCCCAACATCATCAACC     | TCTCCGACCAGCACATTCC      |
| EOMES       | CCCAGACCCAACCTTTCC       | GAGCCAATTTCTCTTTCACTT    |
| MIXL1       | CGGCGTCAGAGTGGGAAAT      | GTTCCGGGCAGGCAGTTCA      |
| SOX7        | GAGCACCCCTGGCTTCGA       | TCTCTGTGGGACCCGTTG       |
| HNF1B       | CCGATGATGCCTGCTCTGA      | CCCTGTTGCATTCTCCACT      |
| MAP2        | GTACCTGGAGGTGGTAATGTCAAG | GCAGTGACATCCTCAGCCAAAGTG |
| PAX6        | CATCTTTGCTTGGGAAATCCG    | GGCAGCCATCTTGCGTAGGTT    |
| CD34        | CCTGAGCAAGATGTTGCAAGCCA  | TCAGGAAATAGCCAGTGATGCCCA |
| CD31        | CACCAAGATAGCCTCAAAGTCG   | GCTGGGAGAGCATTTCACATA    |
| VEC/CDH5    | AAGCCCTACCAGCCCAAAGTG    | CCGTGTTATCGTGATTATCCGTGA |
| vWF         | TTCCAGAATGGCAAGAGAGTG    | TGAGTTGGCAAAGTCATAAGG    |
| eNOS        | CGCCACGGCCTCTTTCAT       | TACAGGATTGTCCGCTTCACT    |
| FLK1        | CCAATAATCAGAGTGGCAGTG    | CATAGACATAAATGACCGAGGC   |
| TAL1/SCL    | TGGATTGCTTGAGTTAGG       | AGGGAGCCAGAAGTTTGAG      |
| LMO2        | CCACAGCCCATCCATAGTAAC    | TCGCAAGCGTCAAAGTCA       |
| CD41        | TTCTGGGTCAGAGTGAGGG      | CAGGTCTGGGTATCCGTTGTC    |
| RUNX1       | GATGGCACTCTGGTCACTG      | TTTCCCTCTTCCACTTCG       |
| GATA-1      | GCCTCTATCACAAGATGAATGG   | CACAGTGTCTGGTGGTTCGT     |
| HBE         | TGGAGCAAGATGAATGTGGAA    | CAGGATGGCAGAGGGAGACGA    |
| HBG         | GGACAAGGCTACTATCACAA     | CTCCCAAGGAAGTCAGC        |

qPCR, quantitative polymerase chain reaction; RT-PCR, reverse transcription polymerase chain reaction.
